# Supplementary material for: Autonomous interconversion between adult pancreatic α-cells and β-cells after differential metabolic challenges
Source: PubMed Central journal article supplement — Mol Metab. 2016 May 10;5(7):437–48. doi: 10.1016/j.molmet.2016.05.001 (PMC4921793; doi:10.1016/j.molmet.2016.05.001), 2016-05-10
Supplement: mmc2.pdf [file mmc2.pdf]

**Table S2. Primers for RT-qPCR**

| <b>Gene</b>                     | <b>Forward Primer</b>           | <b>Reverse Primer</b>                |
|---------------------------------|---------------------------------|--------------------------------------|
| Nkx6.1 (mouse & golden hamster) | 5'-CGCTTCAGCAGCCTGAGCCC-3'      | 5'-GTGTGTTTTCTCTTCCCATCTTTGTCCA-3'   |
| Nkx6.1 (golden hamster only)    | 5'-TGGCCTGTACCCCCATCAG-3'       | 5'-CATCCCCAAGAATAGGCTAAGCGA-3'       |
| Ins1                            | 5'-GACCATCAGCAAGCAGGTCATTG-3'   | 5'-GGACTTGGGTGTGTAGAAGAAGCCAC-3'     |
| Ins2                            | 5'-ATGGCCCTGTGGATGCGCTT-3'      | 5'-CAGCTCCAGTTGTGCCACTTGTG-3'        |
| MafA                            | 5'-CTTCCGGGGTCAGAGCTTCGC-3'     | 5'-GCCGCTTCTGTTTCAGTCGGATG-3'        |
| Ccna2                           | 5'-GCTCAAGACTCGACGGGTTC-3'      | 5'-CACTTTAGGTTTACATTTAACCTCCATTTC-3' |
| Ccnb1                           | 5'-AAGAGTGCCTCTGAAAAGGGAAGC-3'  | 5'-GGTCTAACTGACTGCTCTTCCTCCAG-3'     |
| Ccne1                           | 5'-GCCATGCCAAGGGAGAGAGAC-3'     | 5'-TCTATTGCCCAATTCAAGACGG-3'         |
| Cdk1                            | 5'-CGACATCCAAATATAGTCAGCCTGC-3' | 5'-CGGTACCACAGCGTCACTACCTC-3'        |
| Cdk2                            | 5'-TCACCCTAATATCGTCAAGCTGCTG-3' | 5'-GGTACCACAGGGTCACCACCTC-3'         |
| PTTG1                           | 5'-GACCTTGACTGGGAAAAGATCACC-3'  | 5'-GGGAGGAGAGTACAGCGGATCAG-3'        |
| VGF                             | 5'-TCGTGACACCGGCTGTCTCTG-3'     | 5'-CTCTGGTACGCCGTCATCCTTTG-3'        |
